# Supplementary material for: Design and construction of IR780- and EGCG-based and mitochondrial targeting nanoparticles and their application in tumor chemo-phototherapy
Source: Royal Society of Chemistry journal article supplement (doi:10.1039/d1tb01899j), 2021-01-01
Supplement: d1tb01899j1.pdf [file d1tb01899j1.pdf]

## Supplementary Information

Design and construction of IR780- and EGCG-based and mitochondrial targeting nanoparticles and their application in tumor chemo-phototherapy

Jiahe Bao,<sup>†a</sup> Yinan Zhao,<sup>†a</sup> Jing Xu<sup>\*a</sup> and Yuanqiang Guo<sup>\*a</sup>

<sup>a</sup> State Key Laboratory of Medicinal Chemical Biology, College of Pharmacy, and Tianjin key Laboratory of Molecular Drug Research, Nankai University, Tianjin, 300350, People's Republic of China.

\* Corresponding author.

Tel/fex: +86-22-23507760; E-mail address: xujing611@nankai.edu.cn (J. Xu);

victgyq@nankai.edu.cn (Y. Guo).

<sup>†</sup> These authors contributed equally to this work.

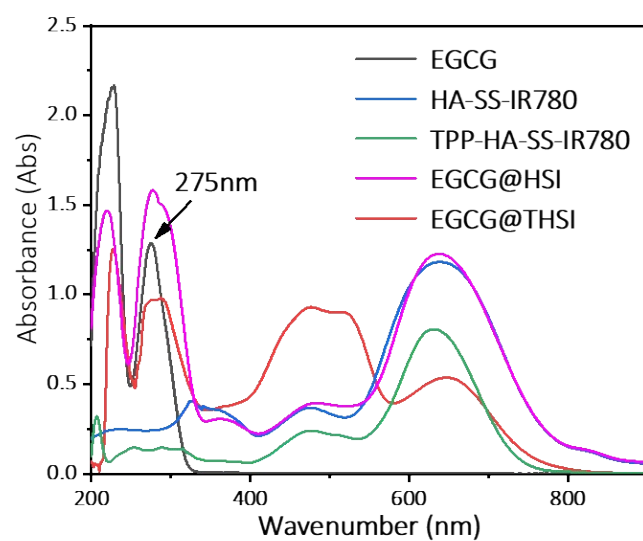

**Figure S1** The UV vis spectra of EGCG, HA-SS-IR780, TPP-HA-SS-IR780, EGCG@HSI and EGCG@THSI.

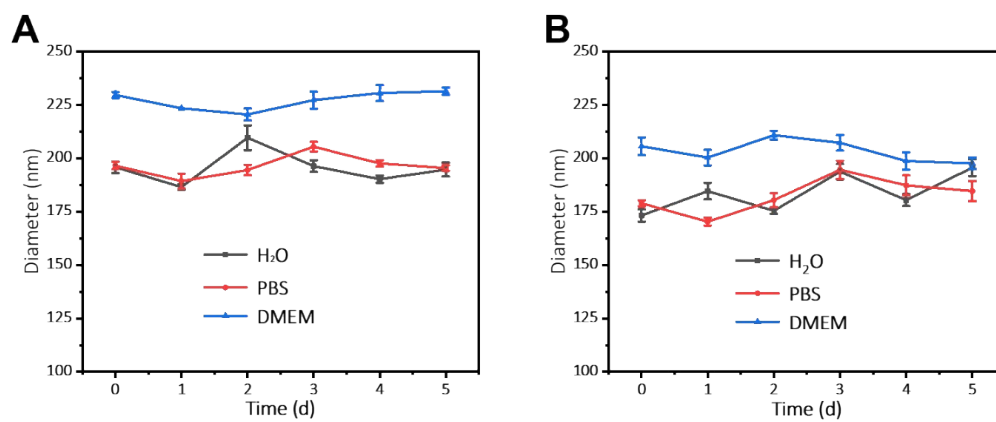

**Figure S2** Size stability of EGCG@THSI (A) and EGCG@HSI (B) nanoparticles in DI water, PBS, and DMEM within 5 d.

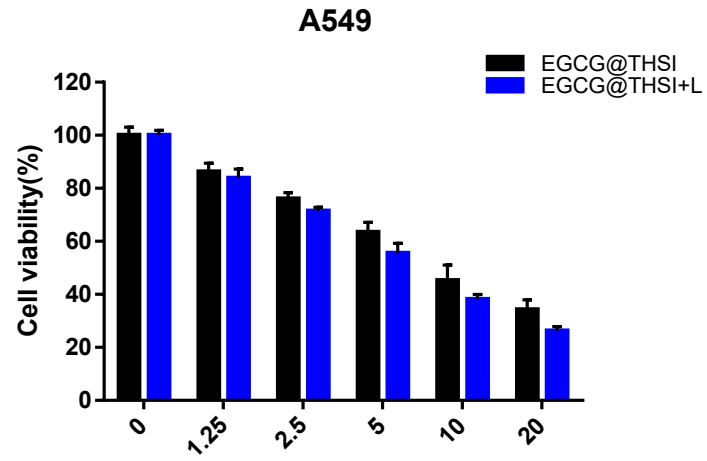

**Figure S3** *In vitro* cytotoxicity assays. Cell viability of A549 cells after treated with EGCG@THSI NPs for 6 h, with or without laser irradiation ( $0.8 \text{ W cm}^{-2}$ , 2 min).
